# Supplementary material
Source: PubMed Central journal article supplement (PMC10089961)
Supplement: NIHMS1855594-supplement-supinfo.pdf [file NIHMS1855594-supplement-supinfo.pdf]

**Supplemental Table 1.** Association between Sociodemographic factors and Technology with Social Isolation in 2015 (N = 6,704)

|                         | <b>IRR (95%CI), p value</b> |
|-------------------------|-----------------------------|
| <b>Age</b>              |                             |
| 65-69                   | Reference                   |
| 70-74                   | 0.943(0.817-1.090), 0.423   |
| 75-79                   | 1.070(0.894-1.280), 0.454   |
| 80-84                   | 1.048(0.865-1.271), 0.624   |
| 85-89                   | 1.158(0.950-1.411), 0.142   |
| 90+                     | 1.570(1.267-1.945), <0.001  |
| <b>Gender</b>           |                             |
| M                       | Reference                   |
| F                       | 0.779(0.694-0.875), <0.001  |
| <b>Race/Ethnicity</b>   |                             |
| White, non-Hispanic     | Reference                   |
| Black, non-Hispanic     | 1.064(0.933-1.212), 0.349   |
| Other (Am Indian/Asian) | 1.049(0.747-1.473), 0.777   |
| Hispanic                | 1.283(1.060-1.552), 0.011   |
| More than one DKRF      | 1.359(0.332-5.567), 0.664   |
| DKRF                    | 1.021(0.709-1.471), 0.909   |
| <b>Income category</b>  |                             |
| < \$50,000              | Reference                   |
| \$50,000 - \$100,000    | 0.600(0.492-0.732), <0.001  |
| > \$100,000             | 0.450(0.338-0.598), <0.001  |
| <b>Education</b>        |                             |
| <HS                     | Reference                   |
| HS/GED/Trade            | 0.659(0.563-0.770), <0.001  |
| >HS                     | 0.506(0.438-0.583), <0.001  |
| <b>Technology</b>       |                             |
| Working Cell (Y)        | 0.528(0.470-0.593), <0.001  |
| Working Computer (Y)    | 0.490(0.445-0.540), <0.001  |
| Email or Text (Y)       | 0.581(0.512-0.659), <0.001  |

**Supplemental Table 2.** Specific Internet Uses by Social Isolation in 2015 Baseline Sample

| <b>Internet Uses<br/>(n,%)</b>      | <b>No Social<br/>Isolation</b> |       | <b>Social<br/>Isolation</b> |       | <b>Severe<br/>Isolation</b> |       | <b>p value</b> |
|-------------------------------------|--------------------------------|-------|-----------------------------|-------|-----------------------------|-------|----------------|
| <b>Groceries</b>                    | 1012                           | 38.02 | 142                         | 31.98 | 26                          | 35.14 | 0.048          |
| <b>Bills/banking</b>                | 1371                           | 51.50 | 217                         | 48.87 | 40                          | 54.05 | 0.522          |
| <b>Order/refill meds</b>            | 594                            | 22.31 | 92                          | 20.72 | 19                          | 25.68 | 0.578          |
| <b>Contact medical<br/>provider</b> | 772                            | 29.02 | 100                         | 22.52 | 17                          | 22.97 | 0.012          |
| <b>Medicare/Insurance</b>           | 464                            | 17.44 | 60                          | 13.51 | 12                          | 16.22 | 0.122          |
